# Supplementary material for: Human demographic history has amplified the effects of background selection across the genome
Source: PubMed Central journal article supplement (PMC6056204; doi:10.1371/journal.pgen.1007387), 2018-06-18
Supplement: pgen.1007387.s003.pdf [file pgen.1007387.s003.pdf]

## S1 Text

### Recent admixture has not altered the impact of selection at linked sites

We investigated whether the effects of selection at linked sites have remained consistent across human populations that have experienced recent admixture. To do so, we measured normalized and relative diversity (more precisely, heterozygosity) as a function of  $B$  in the 6 admixed TGP populations (ASW, ACB, CLM, MXL, PEL, and PUR). We first used local ancestry to divide up admixed samples into genomic segments that are homozygous for a specific local ancestry (i.e., African, European, or Native American). These homozygous ancestral segments are simply regions of the genome in which both maternal and paternal copies of an individual's chromosomes were inferred to have the same ancestral label. To do this, we used the ancestry deconvolution results generated by the 1000 Genomes Project Consortium (see [ftp://ftp.1000genomes.ebi.ac.uk/vol1/ftp/technical/working/20140818\\_ancestry\\_deconvolution/README\\_20140721\\_phase3\\_ancestry\\_deconvolution](ftp://ftp.1000genomes.ebi.ac.uk/vol1/ftp/technical/working/20140818_ancestry_deconvolution/README_20140721_phase3_ancestry_deconvolution)). Briefly, the local-ancestry inference tool, RFMix [1], was run across the ACB, ASW, CLM, MXL, PEL, and PUR phase 3 TGP samples. For the reference panel, 50 unrelated shapeit2 [2] trio-phased YRI and CEU samples each (from phase 3 TGP) and 43 shapeit2 population-phased Native American samples (from Ref. [3]) were used. We utilized local ancestry tracks that were inferred by RFMix using “trio-phased” mode.

Admixed samples were then parsed for all genomic segments homozygous for each particular ancestry (i.e., African, European, or Native American). These homozygous segments were also filtered according to the 13-filter set described in the “Filtering and ascertainment scheme” section of Materials and Methods in the main text. Heterozygosity was then calculated across admixed samples for each set of homozygous ancestries and  $B$  quantile bins. Samples were included in this analysis only if the total length of their genome that passed all filters for the particular ancestry and  $B$  quantile bin was greater than 1 Mb. Additionally, per-site

heterozygosity estimates for each ancestry and  $B$  quantile set were averaged across all admixed samples, regardless of their TGP population of origin. Heterozygosity was also normalized by divergence with Rhesus macaque (see Materials and Methods in the main text). See Table E in S1 Text for total number of Mb used in these analyses. For comparison, heterozygosity was also calculated across the 4 continental groups using the same 13-filter set and as a function of the same  $B$  quantile bins.

Across all  $B$  quantile bins, normalized diversity (heterozygosity/divergence) in African and European ancestry segments closely matched the values observed in their non-admixed counterparts (S11 Fig A in S1 Text). However, normalized diversity was significantly lower in the Native American ancestry segments of admixed individuals than in the East Asian continental group (S11 Fig A in S1 Text). This was expected given the more recent divergence of Native American populations and the strong population bottleneck they experienced migrating into the Americas [4-6].

Overall, patterns of relative diversity across local ancestries were similar to the broader analyses of the 20 non-admixed populations, with a consistent rank order of decreasing relative diversity observed for African, European, and Native American ancestral segments. However, for relative diversity calculated using the lowest 1%  $B$  quantile bin (i.e., where selection at linked sites is expected to be strongest), relative diversity in Native American ancestry segments was observed to be greater than for the European continental group or European local ancestry segments, which was inconsistent with the other  $B$  quantile bins.

### **Linear regression of $F_{ST}$ on recombination rate and multiple linear regression of $F_{ST}$ on recombination rate and $B$ .**

$F_{ST}$  calculations were performed as a function of 2% recombination rate quantile bins between every pair of non-admixed phase 3 TGP populations in an identical fashion as was done for  $B$  (see Materials and Methods in main text). To do so, we annotated sites based on the recombination rate estimates from the HapMap II GRCh37 genetic map. To annotate sites in

phase 3 that were not in HapMap II, recombination rates were interpolated to the midway point between the preceding and following positions in HapMap II. If the difference between successive HapMap II positions was greater than 18,848 base pairs (the first standard deviation for the distribution of distances between positions in HapMap II), then the recombination rate was only extended out 9,424 base pairs beyond the focal position. Positions beyond this distance were then ignored during analysis in which the recombination rate was used. Recombination rate quantiles were calculated using the genome-wide distribution of recombination rates (i.e., the distribution of recombination rates across all sites, including those that are not polymorphic in the data set) resulting from the procedure described above.

Simple linear regression was then conducted using the linear model  $F_{ST} = \beta_0 + \beta_1\rho + \varepsilon$  (where  $\rho$  is recombination rate). Recombination rate was scaled to be between 0 and 1 (the minimum and maximum observed recombination rate was 0.0 cM/Mb and 126.88 cM/Mb, respectively) to aid in the comparison of the regression coefficient with  $B$ . Earlier studies using SNP array data have shown that  $F_{ST}$  and recombination rate are correlated in humans [7]. We could only partially replicate these findings when we conducted linear regression with the model  $F_{ST} = \beta_0 + \beta_1\rho + \varepsilon$ . We observed that recombination rate only significantly predicts a change in  $F_{ST}$  across the genome for comparisons between South Asian and East Asian populations (S9 Fig, Table K in S1 Text). This result remained unchanged when performing robust linear regression for the model (Table G in S1 Text).

Since the correlation between  $F_{ST}$  and recombination rate was previously documented as being strongest in coding regions [7], where the effects of selection at linked sites are also expected to be strongest, we investigated whether recombination rate provides added value, in addition to  $B$ , as an explanatory variable for predicting  $F_{ST}$  by using multiple linear regression. To do so, we first split the genome into 2% recombination rate quantile bins and further subdivided each of these bins into 4%  $B$  quantile bins ( $50 \times 25 = 1,250$  bins total). We then

measured  $F_{ST}$  within each bin. We also partitioned sites in the reverse order (2%  $B$  bins followed by 4% recombination rate bins) and repeated all analyses. Our choice of total number of bins resulted in a minimum of 320 SNPs per bin for estimating  $F_{ST}$  between any two populations, which should be sufficient to avoid errors when estimating  $F_{ST}$  across multiple loci [8]. As with the simple linear regression step, recombination rate was scaled to be between 0 and 1 and the mean of the bounds defining each quantile bin was used when defining the explanatory variables. After performing multiple linear regression of  $F_{ST}$  on  $B$ , recombination rate ( $\rho$ ), and an interaction term between the two ( $B\rho$ ) with the linear model  $F_{ST} = \beta_0 + \beta_1 B + \beta_2 \rho + \beta_3 B\rho + \varepsilon$ , we observed that  $B$  was a statistically significant predictor ( $p < 1e-04$ ) for  $F_{ST}$  across all population comparisons regardless of how we partitioned sites (Table H in S1 Text). This result remained unchanged when performing robust regression. In contrast, recombination rate exhibited sporadic significance as an explanatory variable for  $F_{ST}$  across population comparisons and was dependent upon how sites were partitioned (i.e., whether we first partitioned by  $B$  or by recombination rate) (Table H in S1 Text). Furthermore, strong differences between the two binning schemes were observed for the magnitude of the recombination rate regression coefficient for certain population comparisons (e.g., African vs. East Asian and South Asian vs. East Asian), while the coefficients for  $B$  were consistently similar across binning schemes. The direction in which recombination rate explained  $F_{ST}$  was also inconsistent across different population comparisons, with European vs. South Asian and European vs. East Asian comparisons showing a significant positive change in  $F_{ST}$  as a function of increasing recombination rate. This result was contrary to an expectation of decreasing  $F_{ST}$  as a function of increasing recombination rate [7]. We also failed to observe consistent effects from the interaction term for  $B$  and recombination rate on  $F_{ST}$  across population comparisons or binning schemes (Table H in S1 Text). Performing robust regression on the model did not change these results. However, in contrast to recombination rate, when the model was performed utilizing all

TGP populations (i.e., the “Global” estimate), the interaction term was significant in explaining  $F_{ST}$  across both types of binning schemes.

To aid in visualizing the results of our multidimensional linear model, we plotted  $F_{ST}$  for each population comparison as a function of recombination rate (across 4% quantile bins) while conditioning on  $B$  (S10 Fig A in S1 Text). We also plotted points in the reciprocal direction, with  $F_{ST}$  being plotted as a function of  $B$  while conditioning on recombination rate (S10 Fig B in S1 Text). These data points were derived from the same points used as input for the multiple linear regression model described above. These specific results for  $F_{ST}$  between African and South Asian populations showed that  $B$  separated different levels of  $F_{ST}$  across most recombination rate bins (S10 Fig A, Table I in S1 Text). Furthermore, regardless of how  $B$  was conditioned on recombination rate, it still exhibited a strong trend of increasing  $F_{ST}$  as it decreased (i.e., in the direction of stronger BGS) (S10 Fig B, Table J in S1 Text). These patterns were imperfect though, and statistical significance was not always attained, especially for comparisons between non-African populations (S6 Fig, Table J in S1 Text). However, greater separation in  $F_{ST}$  was generally achieved when conditioning recombination rate on  $B$  and the slope was always negative when plotting  $F_{ST}$  against  $B$ , regardless of which recombination rate percentile bin  $B$  was conditioned on.

### **SFS\_CODE command line example**

Below is a representative SFS\_CODE command for running a simulation of BGS and human demography with 20.46% of sites experiencing deleterious mutation in two 1Mb flanking regions surrounding a neutral 30kb central region. Note that we simulate two distributions of fitness effects for purifying selection here (see Materials and Methods in the main text for details). More specifically, this is given by the command `-w 2 -0.3394 0.184 0.00040244 0.0415 0.00515625` (see below) where the ‘-’ in front of 0.3394 allows us to draw from a negative gamma distribution with parameters (0.184, 0.00040244) for 33.94% of selected sites and from a negative gamma distribution with parameters (0.0415, 0.00515625) for

66.06% of selected sites. This ability to draw from two negative gamma distributions of fitness effects is a special option not available in the general distribution of SFS\_CODE. It is available in the tar file S1\_File\_SFS\_CODE\_torres\_et\_al\_2018.tar.gz in supplemental files.

```
sfs_code 3 1 -A -r 6.0443e-05 -N 18449 -s 1100 -n 100 -TS 0.437017 0 1
-TS 0.546498 1 2 -TE 0.5994242 -Td 0 P 0 2.10709 -Td 0.437017 P 1
0.152957396219 -Td 0.546498 P 1 0.573964845871 -Tg 0.546498 P 1
60.0453856768 -Td 0.546498 P 2 0.221523138739 -Tg 0.546498 P 2
95.5344964867 -Tm 0.437017 P 0 1 6.0846016512 -Tm 0.437017 P 1 0
0.9306848256 -Tm 0.546498 L 0.39374558703 0.104413684315
0.034567778862 0.067228907022 0.0035379117753 0.0259471614066 -t
0.0002650345 -L 11 200000 200000 200000 200000 200000 30000 200000
200000 200000 200000 200000 -v L A 40920 -v L 5 30000 -W 2 -0.3394
0.184 0.00040244 0.0415 0.00515625 -W L 5 0 --printLocus 5 -a N -Tn
0.437017 100 -Tn 0.546498 100 -Tn 0 R 0.00271017399317 100
```

## References

1. Maples BK, Gravel S, Kenny EE, Bustamante CD. RFMix: A discriminative modeling approach for rapid and robust local-ancestry inference. *Am J Hum Genet.* 2013;93: 278–288. doi:10.1016/j.ajhg.2013.06.020
2. O’Connell J, Gurdasani D, Delaneau O, Pirastu N, Ulivi S, Cocca M, et al. A general approach for haplotype phasing across the full spectrum of relatedness. *PLoS Genet.* 2014;10: e1004234. doi:10.1371/journal.pgen.1004234
3. Mao X, Bigham AW, Mei R, Gutierrez G, Weiss KM, Brutsaert TD, et al. A genomewide admixture mapping panel for Hispanic/Latino populations. *Am J Hum Genet.* 2007;80: 1171–1178. doi:10.1086/518564
4. Ramachandran S, Deshpande O, Roseman CC, Rosenberg NA, Feldman MW, Cavalli-Sforza LL. Support from the relationship of genetic and geographic distance in human populations for a serial founder effect originating in Africa. *Proc Natl Acad Sci.* 2005;102: 15942–15947. doi:10.1073/pnas.0507611102
5. Moreno-Estrada A, Gignoux CR, Fernández-López JC, Zakharia F, Sikora M, Contreras AV, et al. The genetics of Mexico recapitulates Native American substructure and affects biomedical traits. *Science.* 2014;344: 1280–1285. doi:10.1126/science.1251688
6. Hey J. On the number of new world founders: A population genetic portrait of the peopling of the Americas. *PLoS Biol.* 2005;3: 0965–0975. doi:10.1371/journal.pbio.0030193
7. Keinan A, Reich D. Human population differentiation is strongly correlated with local recombination rate. *PLoS Genet.* 2010;6: e1000886. doi:10.1371/journal.pgen.1000886
8. Willing EM, Dreyer C, van Oosterhout C. Estimates of genetic differentiation measured by  $F_{ST}$  do not necessarily require large sample sizes when using many SNP markers. *PLoS One.* 2012;7: e42649. doi:10.1371/journal.pone.0042649

**Table A**

| <b>Parameters</b>                      | <b><math>B \geq 0.994</math></b> | <b>four-fold degenerate</b> |
|----------------------------------------|----------------------------------|-----------------------------|
| $N_{Ancestral}$                        | 18,449                           | 17,118                      |
| $N_{AFR}$                              | 38,874                           | 47,537                      |
| $N_{Bott}$                             | 5,946                            | 6,408                       |
| $N_{EUR0}$                             | 3,413                            | 4,331                       |
| $N_{EUR}$                              | 81,901                           | 100,614                     |
| $N_{EASN0}$                            | 1,317                            | 1,678                       |
| $N_{EASN}$                             | 206,804                          | 266,616                     |
| $T_{AFR}+T_{Bott}+T_{EUR\_EASN}$ (kya) | 552,939                          | 413,337                     |
| $T_{Bott}+T_{EUR\_EASN}$ (kya)         | 149,813                          | 198,603                     |
| $T_{EUR\_EASN}$ (kya)                  | 48,822                           | 69,584                      |
| $r_{EUR}$ (%)                          | 0.163                            | 0.113                       |
| $r_{EASN}$ (%)                         | 0.259                            | 0.182                       |
| $m_{AFR-Bott}$ ( $\times 10^{-5}$ )    | 7.83                             | 7.02                        |
| $m_{AFR-EUR}$ ( $\times 10^{-5}$ )     | 0.51                             | 0.47                        |
| $m_{AFR-EASN}$ ( $\times 10^{-5}$ )    | 0.13                             | 0.18                        |
| $m_{EUR-EASN}$ ( $\times 10^{-5}$ )    | 0.98                             | 1.14                        |

**Table A.** Inferred parameters from running dadi on TGP CG data across neutral regions in the highest 1%  $B$  value bin ( $B \geq 0.994$ ) and across four-fold degenerate sites. The demographic model inferred is the Out-of-Africa demographic model of Gutenkunst et al. 2009 (Ref. [7] in main text). Time parameters,  $T$ , assume a generation time of 25 years per generation. Growth rates,  $r$ , and migration rates,  $m$ , are per generation. Parameters with subscript, “*Bott*”, represent parameters inferred for the ancestral European and East Asian out-of-Africa bottleneck population. Time parameters with subscript “*EUR\_EASN*” represent the European-East Asian population split.

**Table B. TGP Complete Genomics dataset unrelated YRI, CHS, and CEU samples.**

| <b>Population</b> | <b>Sample ID</b> | <b>Population</b> | <b>Sample ID</b> |
|-------------------|------------------|-------------------|------------------|
| YRI               | NA18498          | CHS               | HG00608          |
| YRI               | NA18499          | CHS               | HG00610          |
| YRI               | NA18501          | CHS               | HG00611          |
| YRI               | NA18502          | CHS               | HG00613          |
| YRI               | NA18504          | CHS               | HG00614          |
| YRI               | NA18505          | CHS               | HG00619          |
| YRI               | NA19107          | CHS               | HG00620          |
| YRI               | NA18507          | CHS               | HG00625          |
| YRI               | NA18508          | CHS               | HG00626          |
| YRI               | NA18522          | CHS               | HG00628          |
| YRI               | NA18870          | CHS               | HG00629          |
| YRI               | NA18871          | CHS               | HG00650          |
| YRI               | NA18909          | CHS               | HG00651          |
| YRI               | NA18916          | CHS               | HG00653          |
| YRI               | NA18917          | CHS               | HG00654          |
| YRI               | NA18923          | CHS               | HG00662          |
| YRI               | NA18924          | CHS               | HG00663          |
| YRI               | NA18933          | CHS               | HG00671          |
| YRI               | NA18934          | CHS               | HG00672          |
| YRI               | NA19186          | CHS               | HG00683          |
| YRI               | NA19093          | CHS               | HG00684          |
| YRI               | NA19097          | CHS               | HG00689          |
| YRI               | NA19137          | CHS               | HG00690          |
| YRI               | NA19138          | CHS               | HG00692          |
| YRI               | NA19200          | CHS               | HG00693          |
| YRI               | NA19201          | CEU               | NA06984          |
| YRI               | NA19171          | CEU               | NA06989          |
| YRI               | NA19172          | CEU               | NA12347          |
| YRI               | NA19210          | CEU               | NA12348          |
| YRI               | NA19159          | CEU               | NA12340          |
| YRI               | NA19160          | CEU               | NA12341          |
| YRI               | NA19222          | CEU               | NA06994          |
| YRI               | NA19116          | CEU               | NA07000          |
| YRI               | NA19152          | CEU               | NA07346          |
| YRI               | NA19153          | CEU               | NA07347          |
| YRI               | NA19143          | CEU               | NA12045          |
| YRI               | NA19144          | CEU               | NA12046          |
| YRI               | NA19146          | CEU               | NA11829          |
| YRI               | NA19147          | CEU               | NA11830          |



|     |         |
|-----|---------|
| YRI | NA19113 |
| YRI | NA19114 |
| YRI | NA19256 |
| YRI | NA19257 |
| YRI | NA19117 |
| YRI | NA19118 |
| YRI | NA19130 |
| YRI | NA19098 |
| YRI | NA19189 |
| YRI | NA19190 |
| YRI | NA19236 |
| YRI | NA19238 |
| YRI | NA19239 |
| YRI | NA19247 |
| CHS | HG00403 |
| CHS | HG00404 |
| CHS | HG00406 |
| CHS | HG00407 |
| CHS | HG00421 |
| CHS | HG00422 |
| CHS | HG00436 |
| CHS | HG00437 |
| CHS | HG00442 |
| CHS | HG00443 |
| CHS | HG00448 |
| CHS | HG00449 |
| CHS | HG00463 |
| CHS | HG00464 |
| CHS | HG00472 |
| CHS | HG00473 |
| CHS | HG00475 |
| CHS | HG00476 |
| CHS | HG00478 |
| CHS | HG00479 |
| CHS | HG00530 |
| CHS | HG00531 |
| CHS | HG00533 |
| CHS | HG00534 |
| CHS | HG00536 |
| CHS | HG00537 |
| CHS | HG00542 |

|     |         |
|-----|---------|
| CEU | NA11831 |
| CEU | NA11832 |
| CEU | NA12489 |
| CEU | NA12546 |
| CEU | NA12399 |
| CEU | NA12400 |
| CEU | NA12413 |
| CEU | NA12414 |
| CEU | NA12716 |
| CEU | NA12717 |
| CEU | NA11994 |
| CEU | NA11995 |
| CEU | NA11893 |
| CEU | NA11894 |
| CEU | NA12155 |
| CEU | NA12156 |
| CEU | NA12272 |
| CEU | NA12273 |
| CEU | NA12003 |
| CEU | NA12004 |
| CEU | NA12005 |
| CEU | NA12006 |
| CEU | NA12286 |
| CEU | NA12287 |
| CEU | NA11919 |
| CEU | NA11920 |
| CEU | NA11930 |
| CEU | NA11931 |
| CEU | NA12750 |
| CEU | NA12751 |
| CEU | NA12760 |
| CEU | NA12761 |
| CEU | NA12762 |
| CEU | NA12763 |
| CEU | NA12775 |
| CEU | NA12776 |
| CEU | NA12777 |
| CEU | NA12778 |
| CEU | NA12812 |
| CEU | NA12813 |
| CEU | NA12814 |

|     |         |
|-----|---------|
| CHS | HG00543 |
| CHS | HG00556 |
| CHS | HG00557 |
| CHS | HG00559 |
| CHS | HG00560 |
| CHS | HG00589 |
| CHS | HG00590 |
| CHS | HG00592 |
| CHS | HG00593 |
| CHS | HG00607 |

|     |         |
|-----|---------|
| CEU | NA12815 |
| CEU | NA12827 |
| CEU | NA12828 |
| CEU | NA12829 |
| CEU | NA12830 |
| CEU | NA12842 |
| CEU | NA12843 |
| CEU | NA12872 |
| CEU | NA12873 |

**Table C**

| <b>Henn et al. 2016 samples</b> |                        |                   |
|---------------------------------|------------------------|-------------------|
| <b>SampleID</b>                 | <b>Number of Sites</b> | <b>Mean Depth</b> |
| HGDP00991                       | 2,207,845              | 6.96118           |
| HGDP00987                       | 2,229,426              | 7.19132           |
| HGDP01036                       | 2,373,023              | 11.6072           |
| HGDP00992                       | 2,452,509              | 12.1913           |
| HGDP01029                       | 2,415,792              | 12.3526           |
| HGDP01032                       | 2,407,400              | 12.8113           |
| <b>Kidd et al. 2014 samples</b> |                        |                   |
| <b>SampleID</b>                 | <b>Number of Sites</b> | <b>Mean Depth</b> |
| SA1000A                         | 547,527                | 2.56481           |
| SA1025A                         | 2,136,905              | 9.1239            |
| <b>Kim et al. 2014 samples</b>  |                        |                   |
| <b>SampleID</b>                 | <b>Number of Sites</b> | <b>Mean Depth</b> |
| KB2                             | 2,756,225              | 27.5951           |
| NB1                             | 2,599,220              | 28.0148           |
| MD8                             | 2,777,871              | 38.4532           |
| NB8                             | 2,778,198              | 40.1789           |
| KB1                             | 2,757,336              | 50.5629           |

**Table C.** Number of polymorphic sites and mean depth coverage of 13 KhoeSan samples used for SNP ascertainment in calculations of  $F_{ST}$  from studies of Henn et al. 2016, Kidd et al. 2014, and Kim et al. 2014 (Refs. [95-97] in main text).

**Table D**

|                                                | <b>lowest<br/>1% <i>B</i></b> | <b>lowest<br/>5% <i>B</i></b> | <b>lowest 10%<br/><i>B</i></b> | <b>lowest 25%<br/><i>B</i></b> | <b>highest<br/>1% <i>B</i></b> |
|------------------------------------------------|-------------------------------|-------------------------------|--------------------------------|--------------------------------|--------------------------------|
| <b>filters</b>                                 | 7.59                          | 40.42                         | 87.86                          | 246.59                         | 13.1                           |
| <b>filters + gBGC<br/>and hotspots removal</b> | 7.26                          | 38.68                         | 83.75                          | 231.71                         | 7.94                           |

**Table D.** Total number of Mb in the human genome passing the set of 13 filters described in Materials and Methods that were used for calculating pairwise genetic diversity ( $\pi$ ) for each quantile of *B*. The bottom row is the total number Mb when including the set of filters to remove regions sensitive to GC-biased gene conversion (gBGC) or sites in recombination hotspots. Additionally, these totals only include those 100 kb regions that had a minimum of 10 kb of divergence information for Rhesus macaque (see Materials and Methods).

**Table E**

| <b>Ancestry</b> | <b>lowest 1%<br/><i>B</i></b> | <b>lowest 5%<br/><i>B</i></b> | <b>lowest 10%<br/><i>B</i></b> | <b>lowest 25%<br/><i>B</i></b> | <b>highest<br/>1% <i>B</i></b> |
|-----------------|-------------------------------|-------------------------------|--------------------------------|--------------------------------|--------------------------------|
| African         | 841.97                        | 4471.54                       | 9720.15                        | 27333.95                       | 1447.04                        |
| European        | 815.74                        | 4296.69                       | 9293.04                        | 26034.57                       | 1366.26                        |
| Native American | 497.29                        | 2603.12                       | 5640.13                        | 15776.71                       | 834.46                         |

**Table E.** Total number of Mb of homozygous ancestry that passed all filters and were used in the analyses of admixed samples in the 6 admixed TGP populations (ACB, ASW, CLM, MXL, PEL, PUR) for each quantile of *B*. Additionally, these totals only include those 100 kb regions that had a minimum of 10 kb of divergence information for Rhesus macaque (see Materials and Methods).

**Table F**

|                                               | <b>AFR vs.<br/>EASN</b>              | <b>AFR vs.<br/>EUR</b>               | <b>AFR vs.<br/>SASN</b>              | <b>EUR vs.<br/>SASN</b>              | <b>EUR vs.<br/>EASN</b>              | <b>SASN vs.<br/>EASN</b>             | <b>Global</b>                        |
|-----------------------------------------------|--------------------------------------|--------------------------------------|--------------------------------------|--------------------------------------|--------------------------------------|--------------------------------------|--------------------------------------|
| $\beta_0$<br><b>± SEM</b><br><b>(p-value)</b> | 0.2043<br>± 0.0036<br>( $< 1e-04$ )  | 0.1724<br>± 0.0031<br>( $< 1e-04$ )  | 0.1591<br>± 0.0028<br>( $< 1e-04$ )  | 0.0459<br>± 0.0011<br>( $< 1e-04$ )  | 0.1214<br>± 0.0029<br>( $< 1e-04$ )  | 0.0880<br>± 0.0021<br>( $< 1e-04$ )  | 0.1337<br>± 0.0020<br>( $< 1e-04$ )  |
| $\beta_1$<br><b>± SEM</b><br><b>(p-value)</b> | -0.0428<br>± 0.0042<br>( $< 1e-04$ ) | -0.0363<br>± 0.0036<br>( $< 1e-04$ ) | -0.0344<br>± 0.0033<br>( $< 1e-04$ ) | -0.0099<br>± 0.0013<br>( $< 1e-04$ ) | -0.0168<br>± 0.0034<br>( $< 1e-04$ ) | -0.0223<br>± 0.0024<br>( $< 1e-04$ ) | -0.0295<br>± 0.0023<br>( $< 1e-04$ ) |

**Table F. Regression coefficient estimates for robust linear regression of  $F_{ST}$  on  $B$ .** To apply an additional test for the relationship between background selection and  $F_{ST}$  that is more robust to outlier points or points with high influence, we performed robust linear regression using M-estimation with Huber weighting. Robust linear regression was run on the same data as was used for the linear regression described for Table 1 in the main text. Each column gives the regression coefficients for the linear model  $F_{ST} = \beta_0 + \beta_1 B$ , where  $B$  represents the mean background selection coefficient for the bin being tested and  $F_{ST}$  is the estimated  $F_{ST}$  for all population comparisons within a particular pair of continental groups. The final column, “Global”, gives the regression coefficients for the linear model applied to all pairwise population comparisons (150 total). Standard errors of the mean (SEM) for  $\beta_0$  and  $\beta_1$  were calculated from 1,000 bootstrap iterations (see Materials and Methods). P-values are derived from a Wald (F-distribution) test on the F-statistic for the corresponding regression coefficient.

**Table G**

|                                               | <b>AFR vs. EASN</b>                 | <b>AFR vs. EUR</b>                  | <b>AFR vs. SASN</b>                 | <b>EUR vs. SASN</b>                 | <b>EUR vs. EASN</b>                 | <b>SASN vs. EASN</b>                | <b>Global</b>                       |
|-----------------------------------------------|-------------------------------------|-------------------------------------|-------------------------------------|-------------------------------------|-------------------------------------|-------------------------------------|-------------------------------------|
| $\beta_0$<br><b>± SEM</b><br><b>(p-value)</b> | 0.1688<br>± 0.0006<br>( $< 1e-04$ ) | 0.1425<br>± 0.0006<br>( $< 1e-04$ ) | 0.1308<br>± 0.0005<br>( $< 1e-04$ ) | 0.0376<br>± 0.0002<br>( $< 1e-04$ ) | 0.1073<br>± 0.0006<br>( $< 1e-04$ ) | 0.0699<br>± 0.0004<br>( $< 1e-04$ ) | 0.1093<br>± 0.0003<br>( $< 1e-04$ ) |
| $\beta_1$<br><b>± SEM</b><br><b>(p-value)</b> | -0.0001<br>± 0.0026<br>(0.9755)     | 0.0007<br>± 0.0022<br>(0.7591)      | 0.0008<br>± 0.0021<br>(0.7281)      | -0.0015<br>± 0.0008<br>(0.4317)     | 0.0004<br>± 0.0020<br>(0.7869)      | -0.0046<br>± 0.0014<br>(0.0225)     | -0.0009<br>± 0.0013<br>(0.9022)     |

**Table G. Regression coefficient estimates for robust linear regression of  $F_{ST}$  on recombination rate.** To apply an additional test for the relationship between recombination rate and  $F_{ST}$  that is more robust to outlier points or points with high influence, we performed robust linear regression using M-estimation with Huber weighting. Robust linear regression was run on the same data as was used for the linear regression described for Table K in S1 Text. Each column gives the regression coefficients for the linear model  $F_{ST} = \beta_0 + \beta_1\rho$ , where  $\rho$  represents the mean recombination rate for the bin being tested and  $F_{ST}$  is the estimated  $F_{ST}$  for all population comparisons within a particular pair of continental groups. The final column, “Global”, gives the regression coefficients for the linear model applied to all pairwise population comparisons (150 total). When performing the regression,  $\rho$  was first scaled to between 0 and 1, such that 1 represents the maximum observed recombination rate (126.88 cM/Mb) and 0 represents the minimum observed recombination rate (0.0 cM/Mb). Standard errors of the mean (SEM) for  $\beta_0$  and  $\beta_1$  were calculated from 1,000 bootstrap iterations (see Materials and Methods). P-values are derived from a Wald (F-distribution) test on the F-statistic for the corresponding regression coefficient.

Table H

|                                 | AFR vs. EASN             |                          | AFR vs. EUR              |                          | AFR vs. SASN             |                          | EUR vs. SASN             |                          | EUR vs. EASN             |                          | SASN vs. EASN            |                          | Global                   |                          |
|---------------------------------|--------------------------|--------------------------|--------------------------|--------------------------|--------------------------|--------------------------|--------------------------|--------------------------|--------------------------|--------------------------|--------------------------|--------------------------|--------------------------|--------------------------|
|                                 | $\rho$ by $B$            | $B$ by $\rho$            | $\rho$ by $B$            | $B$ by $\rho$            | $\rho$ by $B$            | $B$ by $\rho$            | $\rho$ by $B$            | $B$ by $\rho$            | $\rho$ by $B$            | $B$ by $\rho$            | $\rho$ by $B$            | $B$ by $\rho$            | $\rho$ by $B$            | $B$ by $\rho$            |
| $\beta_0$<br>(p-value)          | 0.2037<br>( $< 1e-04$ )  | 0.2054<br>( $< 1e-04$ )  | 0.1713<br>( $< 1e-04$ )  | 0.1725<br>( $< 1e-04$ )  | 0.1594<br>( $< 1e-04$ )  | 0.1609<br>( $< 1e-04$ )  | 0.0450<br>( $< 1e-04$ )  | 0.0451<br>( $< 1e-04$ )  | 0.1200<br>( $< 1e-04$ )  | 0.1209<br>( $< 1e-04$ )  | 0.0888<br>( $< 1e-04$ )  | 0.0903<br>( $< 1e-04$ )  | 0.1314<br>( $< 1e-04$ )  | 0.1325<br>( $< 1e-04$ )  |
| $\beta_0$<br>(p-value) - robust | 0.1995<br>( $< 1e-04$ )  | 0.2019<br>( $< 1e-04$ )  | 0.1696<br>( $< 1e-04$ )  | 0.1709<br>( $< 1e-04$ )  | 0.1567<br>( $< 1e-04$ )  | 0.1589<br>( $< 1e-04$ )  | 0.0450<br>( $< 1e-04$ )  | 0.0449<br>( $< 1e-04$ )  | 0.1185<br>( $< 1e-04$ )  | 0.1199<br>( $< 1e-04$ )  | 0.0853<br>( $< 1e-04$ )  | 0.0868<br>( $< 1e-04$ )  | 0.1314<br>( $< 1e-04$ )  | 0.1329<br>( $< 1e-04$ )  |
| $\beta_1$<br>(p-value)          | -0.0427<br>( $< 1e-04$ ) | -0.0448<br>( $< 1e-04$ ) | -0.0355<br>( $< 1e-04$ ) | -0.0368<br>( $< 1e-04$ ) | -0.0353<br>( $< 1e-04$ ) | -0.0371<br>( $< 1e-04$ ) | -0.0093<br>( $< 1e-04$ ) | -0.0094<br>( $< 1e-04$ ) | -0.0157<br>( $< 1e-04$ ) | -0.0168<br>( $< 1e-04$ ) | -0.0245<br>( $< 1e-04$ ) | -0.0262<br>( $< 1e-04$ ) | -0.0272<br>( $< 1e-04$ ) | -0.0285<br>( $< 1e-04$ ) |
| $\beta_1$<br>(p-value) - robust | -0.0380<br>( $< 1e-04$ ) | -0.0408<br>( $< 1e-04$ ) | -0.0335<br>( $< 1e-04$ ) | -0.0350<br>( $< 1e-04$ ) | -0.0323<br>( $< 1e-04$ ) | -0.0350<br>( $< 1e-04$ ) | -0.0092<br>( $< 1e-04$ ) | -0.0091<br>( $< 1e-04$ ) | -0.0140<br>( $< 1e-04$ ) | -0.0157<br>( $< 1e-04$ ) | -0.0200<br>( $< 1e-04$ ) | -0.0218<br>( $< 1e-04$ ) | -0.0271<br>( $< 1e-04$ ) | -0.0288<br>( $< 1e-04$ ) |
| $\beta_2$<br>(p-value)          | -0.0448<br>( $< 1e-04$ ) | -0.0166<br>(0.0018)      | -0.0300<br>( $< 1e-04$ ) | -0.0285<br>( $< 1e-04$ ) | -0.0332<br>( $< 1e-04$ ) | -0.0324<br>( $< 1e-04$ ) | -0.0039<br>(0.2212)      | 0.0095<br>(0.0002)       | 0.0146<br>(0.0046)       | 0.0142<br>(0.0008)       | -0.0252<br>( $< 1e-04$ ) | -0.0081<br>(0.0481)      | -0.0204<br>(0.0389)      | -0.0103<br>(0.1963)      |
| $\beta_2$<br>(p-value) - robust | -0.0306<br>( $< 1e-04$ ) | -0.0039<br>(0.4085)      | -0.0225<br>( $< 1e-04$ ) | -0.0230<br>( $< 1e-04$ ) | -0.0226<br>( $< 1e-04$ ) | -0.0243<br>( $< 1e-04$ ) | -0.0035<br>(0.2843)      | 0.0104<br>( $< 1e-04$ )  | 0.0178<br>( $< 1e-04$ )  | 0.0180<br>( $< 1e-04$ )  | -0.0125<br>(0.0066)      | 0.0049<br>(0.2047)       | -0.0176<br>(0.0932)      | -0.0096<br>(0.2576)      |
| $\beta_3$<br>(p-value)          | 0.0588<br>( $< 1e-04$ )  | 0.0345<br>( $< 1e-04$ )  | 0.0419<br>( $< 1e-04$ )  | 0.0419<br>( $< 1e-04$ )  | 0.0458<br>( $< 1e-04$ )  | 0.0488<br>( $< 1e-04$ )  | 0.0052<br>(0.1387)       | -0.0094<br>(0.0018)      | -0.0107<br>(0.0585)      | -0.0084<br>(0.0886)      | 0.0286<br>( $< 1e-04$ )  | 0.0127<br>(0.0083)       | 0.0283<br>(0.0092)       | 0.0200<br>(0.0322)       |
| $\beta_3$<br>(p-value) - robust | 0.0436<br>( $< 1e-04$ )  | 0.0201<br>(0.0002)       | 0.0338<br>( $< 1e-04$ )  | 0.0358<br>( $< 1e-04$ )  | 0.0343<br>( $< 1e-04$ )  | 0.0400<br>( $< 1e-04$ )  | 0.0047<br>(0.1889)       | -0.0103<br>(0.0009)      | -0.0146<br>(0.0032)      | -0.0127<br>(0.0047)      | 0.0141<br>(0.0053)       | -0.0023<br>(0.6046)      | 0.0254<br>(0.0269)       | 0.0196<br>(0.0484)       |

**Table H. Multiple Linear Regression and Robust Regression of  $F_{ST}$  on  $B$  and recombination rate.** We performed multiple linear regression of  $B$  and recombination rate on  $F_{ST}$  estimated for 1,250 bins of either 1) 50 2% quantile recombination rate bins by 25 4% quantile  $B$  bins (“ $\rho$  by  $B$ ” in the table) or 2) 50 2% quantile  $B$  bins by 25 4% quantile recombination rate bins (“ $B$  by  $\rho$ ” in the table). Each column gives the regression coefficients for the linear model  $F_{ST} = \beta_0 + \beta_1 B + \beta_2 \rho + \beta_3 B\rho$ , where  $B$  represents the mean background selection coefficient for the bin being tested,  $\rho$  represents the mean recombination rate for the bin being tested, and  $B\rho$  is an interaction term for the background selection coefficient and recombination rate.  $F_{ST}$  is the estimated  $F_{ST}$  for all population comparisons within a particular pair of continental groups except for the final pair of columns, for which the linear model was applied to all pairwise population estimates of  $F_{ST}$  (150 total). When performing the regression,  $\rho$  was first scaled to between 0 and 1, such that 1 represents the maximum observed recombination rate (126.88 cM/Mb) and 0 represents the minimum observed recombination rate (0.0 cM/Mb). We also performed robust linear regression using M-estimation with Huber weighting on the same linear model,  $F_{ST} = \beta_0 + \beta_1 B + \beta_2 \rho + \beta_3 B\rho$ . The regression coefficients from performing robust linear regression are indicated by the rows labeled “robust” in the table. P-values for normal linear regression are derived from a two-sided t-test of the t-value for the corresponding regression coefficients. P-values for robust linear regression are derived from a Wald (F-distribution) test on the F-statistic for the corresponding regression coefficients.

**Table I**

| quantile <i>B</i> bin | AFR vs. EASN     |                  |                  | AFR vs. EUR      |                  |                  | AFR vs. SASN     |                  |                  | EUR vs. SASN    |                 |                  | EUR vs. EASN     |                  |                  | SASN vs. EASN    |                  |                  |
|-----------------------|------------------|------------------|------------------|------------------|------------------|------------------|------------------|------------------|------------------|-----------------|-----------------|------------------|------------------|------------------|------------------|------------------|------------------|------------------|
|                       | 0-2% <i>B</i>    | 8-10% <i>B</i>   | 98-100% <i>B</i> | 0-2% <i>B</i>    | 8-10% <i>B</i>   | 98-100% <i>B</i> | 0-2% <i>B</i>    | 8-10% <i>B</i>   | 98-100% <i>B</i> | 0-2% <i>B</i>   | 8-10% <i>B</i>  | 98-100% <i>B</i> | 0-2% <i>B</i>    | 8-10% <i>B</i>   | 98-100% <i>B</i> | 0-2% <i>B</i>    | 8-10% <i>B</i>   | 98-100% <i>B</i> |
| $\beta_0$ (p-value)   | 0.2058 (< 1e-04) | 0.1838 (< 1e-04) | 0.1561 (< 1e-04) | 0.1689 (< 1e-04) | 0.1463 (< 1e-04) | 0.132 (< 1e-04)  | 0.1643 (< 1e-04) | 0.1425 (< 1e-04) | 0.1238 (< 1e-04) | 0.041 (< 1e-04) | 0.039 (< 1e-04) | 0.0336 (< 1e-04) | 0.1229 (< 1e-04) | 0.1067 (< 1e-04) | 0.0993 (< 1e-04) | 0.1017 (< 1e-04) | 0.0666 (< 1e-04) | 0.0594 (< 1e-04) |
| $\beta_1$ (p-value)   | -0.0464 (0.8263) | 0.0489 (0.4957)  | 0.0157 (0.1663)  | 0.0529 (0.6589)  | 0.0279 (0.5937)  | 0.016 (0.167)    | -0.0273 (0.7961) | 0.002 (0.9735)   | 0.0106 (0.3121)  | 0.0506 (0.1034) | 0.0083 (0.6497) | 0.0028 (0.4086)  | 0.0658 (0.5656)  | 0.0461 (0.4479)  | -0.0046 (0.7096) | -0.0434 (0.6934) | 0.0136 (0.7103)  | -7e-04 (0.9216)  |
| <i>r</i>              | -0.0462          | 0.1429           | 0.2856           | 0.0928           | 0.1121           | 0.2852           | -0.0544          | 0.007            | 0.2107           | 0.3334          | 0.0955          | 0.1729           | 0.1207           | 0.159            | -0.0784          | -0.083           | 0.0782           | -0.0207          |

**Table I. Linear Regression of  $F_{ST}$  on recombination rate but conditioning on *B* quantiles.** This table gives the results of running simple linear regression of  $F_{ST}$  on 25 4% quantile bins of recombination rate ( $\rho$ ), while conditioning on 3 specific quantile bins of *B*. The specific quantile bins of *B* that were conditioned on were 0-2%, 8-10%, and 98-100%. Each column gives the regression coefficients for the linear model  $F_{ST} = \beta_0 + \beta_1\rho + \epsilon$  for each population comparison of  $F_{ST}$ . The correlation coefficient, *r*, between  $\rho$  and  $F_{ST}$  for each population comparison is shown in the bottom row. P-values are derived from a two-sided t-test of the t-value for the corresponding regression coefficient. The values in this table correspond directly to S10 Fig A and S6 Fig.

**Table J**

| quantile $\rho$ bin | AFR vs. EASN     |                   |                  | AFR vs. EUR      |                   |                  | AFR vs. SASN     |                   |                  | EUR vs. SASN     |                  |                  | EUR vs. EASN     |                  |                  | SASN vs. EASN    |                  |                  |
|---------------------|------------------|-------------------|------------------|------------------|-------------------|------------------|------------------|-------------------|------------------|------------------|------------------|------------------|------------------|------------------|------------------|------------------|------------------|------------------|
|                     | 0-2% $\rho$      | 8-10% $\rho$      | 98-100% $\rho$   | 0-2% $\rho$      | 8-10% $\rho$      | 98-100% $\rho$   | 0-2% $\rho$      | 8-10% $\rho$      | 98-100% $\rho$   | 0-2% $\rho$      | 8-10% $\rho$     | 98-100% $\rho$   | 0-2% $\rho$      | 8-10% $\rho$     | 98-100% $\rho$   | 0-2% $\rho$      | 8-10% $\rho$     | 98-100% $\rho$   |
| $\beta_0$ (p-value) | 0.2222 (< 1e-04) | 0.2296 (< 1e-04)  | 0.1907 (< 1e-04) | 0.1749 (< 1e-04) | 0.1852 (< 1e-04)  | 0.1625 (< 1e-04) | 0.1663 (< 1e-04) | 0.1798 (< 1e-04)  | 0.1534 (< 1e-04) | 0.0408 (< 1e-04) | 0.0446 (< 1e-04) | 0.0413 (< 1e-04) | 0.1062 (< 1e-04) | 0.1116 (< 1e-04) | 0.1234 (< 1e-04) | 0.0854 (< 1e-04) | 0.0829 (< 1e-04) | 0.0746 (< 1e-04) |
| $\beta_1$ (p-value) | -0.0545 (0.052)  | -0.0822 (< 1e-04) | -0.0229 (0.016)  | -0.0434 (0.0258) | -0.0601 (< 1e-04) | -0.0222 (4e-04)  | -0.0397 (0.0506) | -0.0639 (< 1e-04) | -0.0218 (0.0015) | -0.0079 (0.1767) | -0.0084 (0.0025) | -0.0054 (0.1041) | -0.0036 (0.8313) | -0.0039 (0.6132) | -0.0182 (0.0429) | -0.0236 (0.0551) | -0.0221 (0.0024) | -0.0122 (0.0139) |
| <i>r</i>            | -0.3929          | -0.7865           | -0.4767          | -0.4451          | -0.7599           | -0.6562          | -0.3951          | -0.78             | -0.6001          | -0.2791          | -0.578           | -0.3328          | -0.0449          | -0.1062          | -0.408           | -0.3883          | -0.5788          | -0.4852          |

**Table J. Linear Regression of  $F_{ST}$  on *B* but conditioning on recombination rate quantiles.** This table gives the results of running simple linear regression of  $F_{ST}$  on 25 4% quantile bins of *B*, while conditioning on 3 specific quantile bins of recombination rate ( $\rho$ ). The specific quantile bins of  $\rho$  that were conditioned on were 0-2%, 8-10%, and 98-100%. Each column gives the regression coefficients for the linear model  $F_{ST} = \beta_0 + \beta_1B + \epsilon$  for each population comparison of  $F_{ST}$ . The correlation coefficient, *r*, between *B* and  $F_{ST}$  for each population comparison is shown in the bottom row. P-values are derived from a two-sided t-test of the t-value for the corresponding regression coefficient. The values in this table correspond directly to S10 Fig B and S6 Fig.

Table K

|                                     | AFR vs.<br>EASN                         | AFR vs.<br>EUR                          | AFR vs.<br>SASN                         | EUR vs.<br>SASN                         | EUR vs.<br>EASN                         | SASN vs.<br>EASN                        | Global                                  |
|-------------------------------------|-----------------------------------------|-----------------------------------------|-----------------------------------------|-----------------------------------------|-----------------------------------------|-----------------------------------------|-----------------------------------------|
| $\beta_0$<br>$\pm$ SEM<br>(p-value) | 0.1688<br>$\pm$ 0.0007<br>( $< 1e-04$ ) | 0.1422<br>$\pm$ 0.0006<br>( $< 1e-04$ ) | 0.1305<br>$\pm$ 0.0006<br>( $< 1e-04$ ) | 0.0373<br>$\pm$ 0.0002<br>( $< 1e-04$ ) | 0.1070<br>$\pm$ 0.0006<br>( $< 1e-04$ ) | 0.0688<br>$\pm$ 0.0004<br>( $< 1e-04$ ) | 0.1091<br>$\pm$ 0.0003<br>( $< 1e-04$ ) |
| $\beta_1$<br>$\pm$ SEM<br>(p-value) | -0.0009<br>$\pm$ 0.0026<br>(0.7073)     | 0.0005<br>$\pm$ 0.0022<br>(0.8454)      | 0.0005<br>$\pm$ 0.0021<br>(0.8196)      | -0.0015<br>$\pm$ 0.0007<br>(0.3906)     | 0.0005<br>$\pm$ 0.0021<br>(0.7002)      | -0.0050<br>$\pm$ 0.0014<br>(0.0363)     | -0.0010<br>$\pm$ 0.0012<br>(0.8842)     |
| $r$<br>$\pm$ SEM                    | -0.0106<br>$\pm$ 0.0287                 | 0.0055<br>$\pm$ 0.0257                  | 0.0065<br>$\pm$ 0.0253                  | -0.0243<br>$\pm$ 0.0119                 | 0.0109<br>$\pm$ 0.0379                  | -0.0592<br>$\pm$ 0.0159                 | -0.0017<br>$\pm$ 0.0021                 |

**Table K. Regression coefficient estimates for linear regression of  $F_{ST}$  on 2% quantile bins of recombination rate.** The first two rows give the regression coefficients for the linear model  $F_{ST} = \beta_0 + \beta_1\rho + \varepsilon$ , where  $\rho$  represents the mean recombination rate for the bin being tested and  $F_{ST}$  is the estimated  $F_{ST}$  for all population comparisons within a particular pair of continental groups (given in the column header). The final column, “Global”, gives the regression coefficients for the linear model applied to all pairwise population comparisons (150 total). When performing the regression,  $\rho$  was first scaled to between 0 and 1, such that 1 represents the maximum observed recombination rate (126.88 cM/Mb) and 0 represents the minimum observed recombination rate (0.0 cM/Mb). The correlation coefficient,  $r$ , between  $\rho$  and  $F_{ST}$  for each comparison is shown in the bottom row. Standard errors of the mean (SEM) for  $\beta_0$ ,  $\beta_1$ , and  $r$  were calculated from 1,000 bootstrap iterations (see Materials and Methods). P-values are derived from a two-sided t-test of the t-value for the corresponding regression coefficient.



**Table L. Phase 3 TGP population information and classification by continental group (or classified as admixed).**

| Population                                                        | Ethnic Group/Population | TGP Population Label | Continental Group (or Admixed) | Sample Size |
|-------------------------------------------------------------------|-------------------------|----------------------|--------------------------------|-------------|
| Esan in Nigeria                                                   | Esan                    | ESN                  | AFR                            | 99          |
| Gambian in Western Division, Mandinka                             | Gambian                 | GWD                  | AFR                            | 113         |
| Luhya in Webuye, Kenya                                            | Luhya                   | LWK                  | AFR                            | 99          |
| Mende in Sierra Leone                                             | Mende                   | MSL                  | AFR                            | 85          |
| Yoruba in Ibadan, Nigeria                                         | Yoruba                  | YRI                  | AFR                            | 108         |
| Utah residents (CEPH) with Northern and Western European ancestry | CEPH                    | CEU                  | EUR                            | 99          |
| British in England and Scotland                                   | British                 | GBR                  | EUR                            | 91          |
| Finnish in Finland                                                | Finnish                 | FIN                  | EUR                            | 99          |
| Iberian Populations in Spain                                      | Spanish                 | IBS                  | EUR                            | 107         |
| Toscani in Italia                                                 | Tuscan                  | TSI                  | EUR                            | 107         |
| Bengali in Bangladesh                                             | Bengali                 | BEB                  | SASN                           | 86          |
| Gujarati Indians in Houston, TX, USA                              | Gujarati                | GIH                  | SASN                           | 103         |
| Indian Telugu in the UK                                           | Telugu                  | ITU                  | SASN                           | 102         |
| Punjabi in Lahore, Pakistan                                       | Punjabi                 | PJL                  | SASN                           | 96          |
| Sri Lankan Tamil in the UK                                        | Tamil                   | STU                  | SASN                           | 102         |
| Chinese Dai in Xishuangbanna, China                               | Dai Chinese             | CDX                  | EASN                           | 93          |
| Han Chinese in Beijing, China                                     | Han Chinese             | CHB                  | EASN                           | 103         |
| Southern Han Chinese                                              | Southern Han Chinese    | CHS                  | EASN                           | 105         |
| Japanese in Tokyo, Japan                                          | Japanese                | JPT                  | EASN                           | 104         |
| Kinh in Ho Chi Minh City, Vietnam                                 | Kinh Vietnamese         | KHV                  | EASN                           | 99          |
| African Caribbean in Barbados                                     | Barbadian               | ACB                  | Admixed                        | 96          |
| People with African Ancestry in Southwest USA                     | African-American SW     | ASW                  | Admixed                        | 61          |
| Colombians in Medellin, Colombia                                  | Colombian               | CLM                  | Admixed                        | 94          |
| People with Mexican Ancestry in Los Angeles, CA, USA              | Mexican-American        | MXL                  | Admixed                        | 64          |
| Peruvians in Lima, Peru                                           | Peruvian                | PEL                  | Admixed                        | 85          |
| Puerto Ricans in Puerto Rico                                      | Puerto Rican            | PUR                  | Admixed                        | 104         |

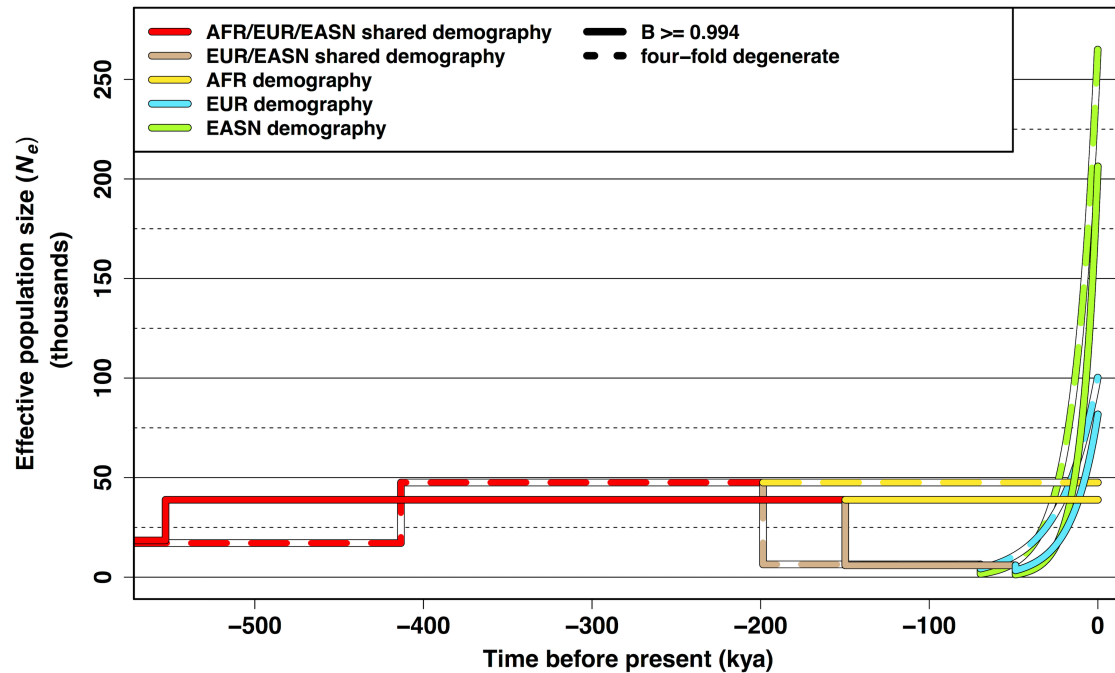

**S1 Fig. Inference models inferred from TGP Complete Genomics (CG) high  $B$  neutral regions and coding four-fold degenerate sites.**

Solid lines are the inference results from running *dadi* on 53 YRI (African), 64 CEU (European), and 62 CHS (East Asian) TGP CG samples (projected down to 106 chromosomes during inference procedure) across neutral regions in the highest 1%  $B$  bin ( $B \geq 0.994$ ). Broken lines represent the inference results using the same CG samples but with sequence data only from coding four-fold degenerate synonymous sites. See Table A in S1 Text for parameter values.

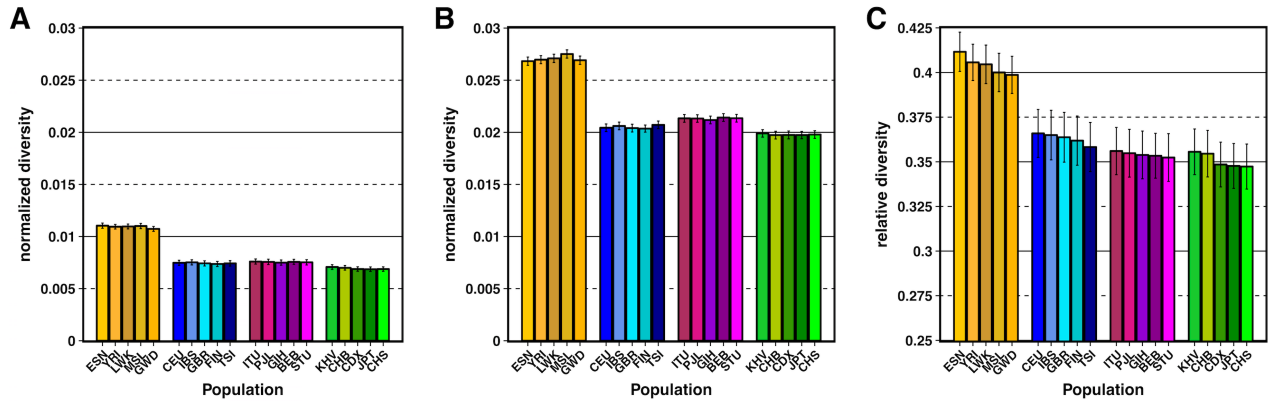

**S2 Fig. Diversity for TGP non-admixed populations while controlling for GC-biased gene conversion and recombination hotspots.**

(A) Normalized diversity ( $\pi/\text{divergence}$ ) measured across the lowest 1%  $B$  quantile bin (strong BGS). (B) Normalized diversity measured across the highest 1%  $B$  quantile bin (weak BGS). (C) Relative diversity: the ratio of normalized diversity for the lowest 1%  $B$  bin to normalized diversity for the highest 1%  $B$  bin ( $\pi/\pi_{\min}$ ). Error bars represent  $\pm 1$  SEM calculated from 1,000 bootstrapped datasets. See S2 Table for underlying data.

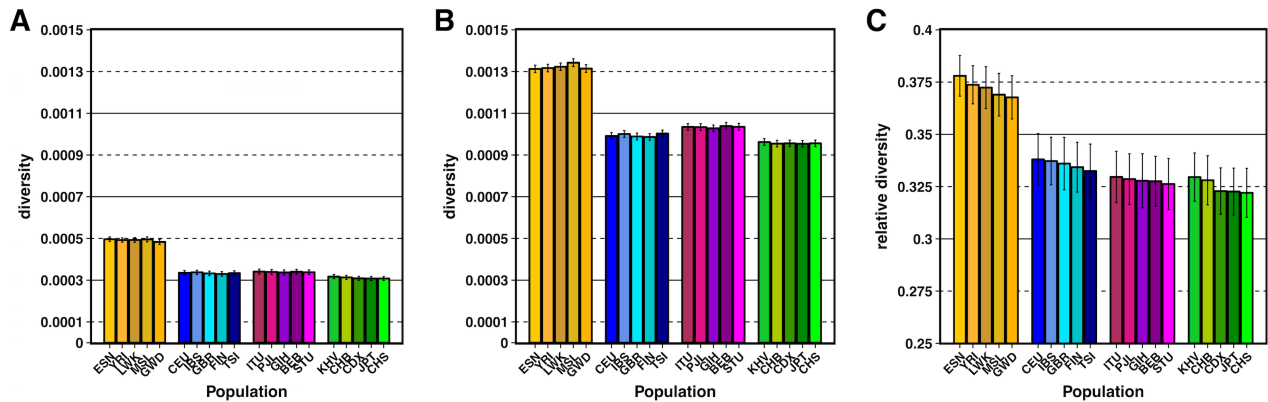

**S3 Fig. Diversity for TGP non-admixed populations without normalizing by divergence with Rhesus macaque.**

(A) Diversity ( $\pi$ ) measured across the lowest 1%  $B$  quantile bin (strong BGS). (B) Diversity measured across the highest 1%  $B$  quantile bin (weak BGS). (C) Relative diversity: the ratio of diversity for the lowest 1%  $B$  bin to diversity for the highest 1%  $B$  bin ( $\pi/\pi_{\min}$ ). Error bars represent  $\pm 1$  SEM calculated from 1,000 bootstrapped datasets. See S1 Table for underlying data.

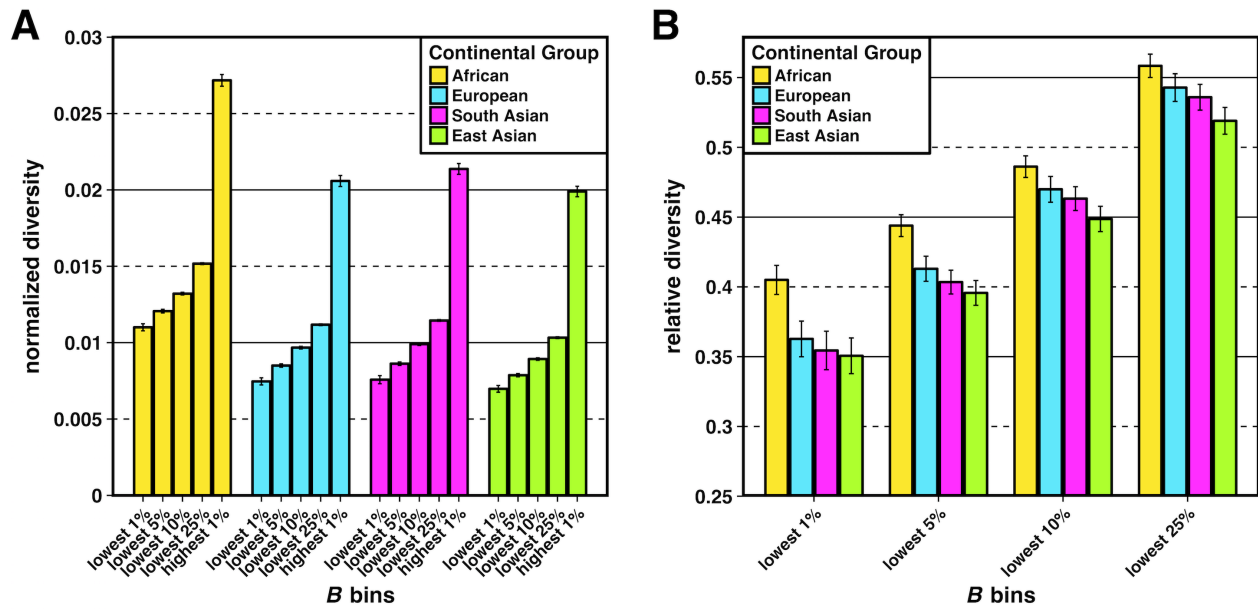

**S4 Fig. Diversity for TGP continental groups while controlling for GC-biased gene conversion and recombination hotspots.**

(A) Normalized diversity ( $\pi/\text{divergence}$ ) measured across the lowest 1%, 5%, 10% and 25%  $B$  quantile bins (strong BGS) and the highest 1%  $B$  quantile bin (weak BGS). (B) Relative diversity ( $\pi/\pi_{\min}$ ) for the lowest 1%, 5%, 10%, and 25%  $B$  bins. Error bars represent  $\pm 1$  SEM calculated from 1,000 bootstrapped datasets. See S2 Table for underlying data.

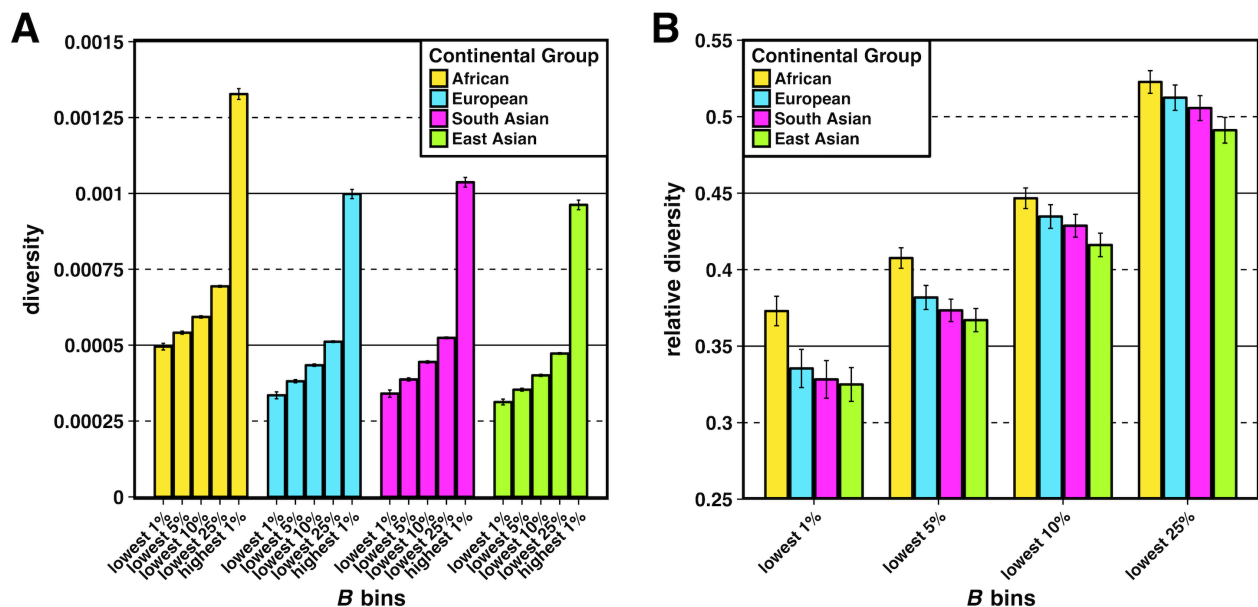

**S5 Fig. Diversity for TGP continental groups without normalizing by divergence with Rhesus macaque.**

(A) Diversity ( $\pi$ ) measured across the lowest 1%, 5%, 10% and 25%  $B$  quantile bins (strong BGS) and the highest 1%  $B$  quantile bin (weak BGS). (B) Relative diversity ( $\pi/\pi_{\min}$ ) for the lowest 1%, 5%, 10%, and 25%  $B$  bins. Error bars represent  $\pm 1$  SEM calculated from 1,000 bootstrapped datasets. See S1 Table for underlying data.

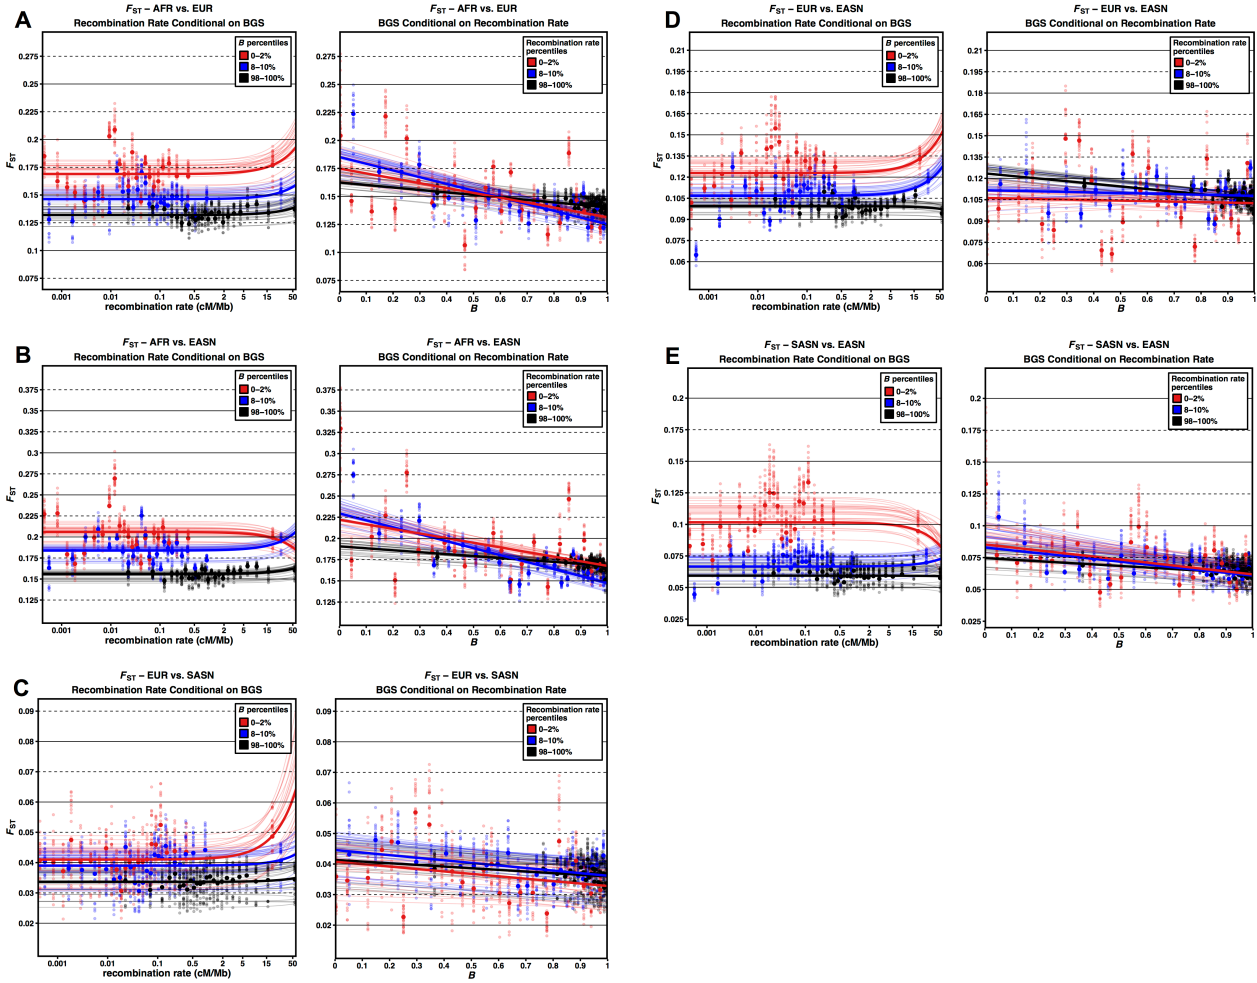

**S6 Fig.  $F_{ST}$  measured across joint bins of  $B$  and recombination rate for different TGP continental groups.**

The left panels of S6 Figs A-E show  $F_{ST}$  measured as a function of 25 4% recombination rate quantile bins conditional on three 2%  $B$  quantile bins (note log scale of x-axis for recombination rate). The right panels of S6 Figs A-E show  $F_{ST}$  measured as a function of 25 4%  $B$  quantile bins conditional on three 2% recombination rate quantile bins. The following continental group comparisons are shown for each plot: (A) African vs. European, (B) African vs. East Asian, (C) European vs. South Asian, (D) European vs. East Asian, (E) South Asian vs. East Asian. Smaller transparent points and lines show the  $F_{ST}$  estimates and corresponding lines of best fit (using linear regression) for each of the pairwise population comparisons within a particular pair of continental groups (25 comparisons total). Larger opaque points are mean  $F_{ST}$  estimates across all pairwise comparisons within a particular pair of continental groups (bold lines showing their corresponding lines of best fit).

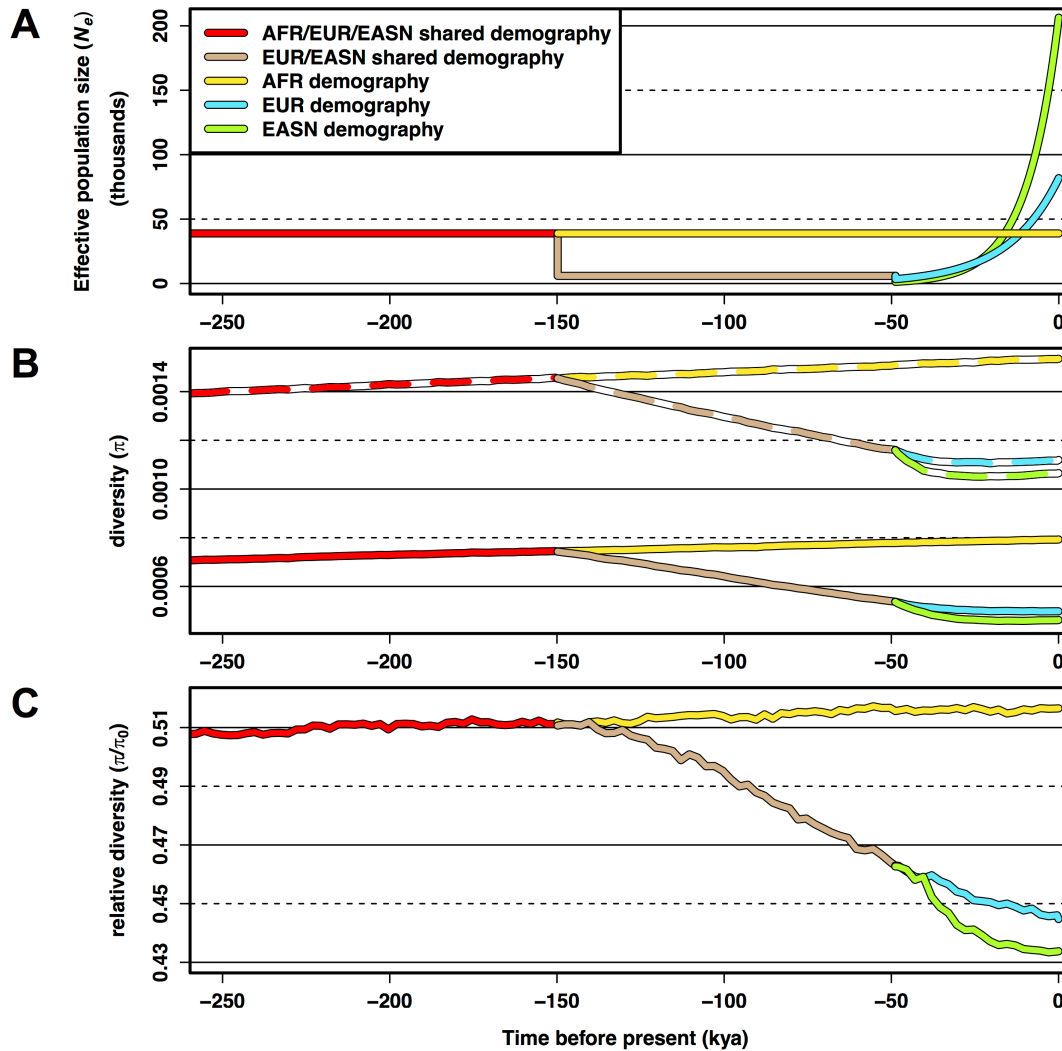

**S7 Fig. Simulations of diversity and relative diversity under BGS using a human demographic model without migration.**

(A) Inferred demographic model from Complete Genomics TGP data. The demographic model used for the simulations in S7 Fig are identical to those used for Fig 5, except that migration parameters between all populations are set to 0. (B) Simulated diversity at neutral sites across populations as a function of time under our inferred demographic model without BGS ( $\pi_0$  - dashed colored lines) and with BGS ( $\pi$  - solid colored lines). (C) Relative diversity ( $\pi/\pi_0$ ) measured by taking the ratio of diversity with BGS ( $\pi$ ) to diversity without BGS ( $\pi_0$ ) at each time point. Note that the x-axes in all three figures are on the same scale. Time is scaled using a human generation time of 25 years per generation. Simulation data was sampled every 100 generations (see S5 Table for exact values of mean  $\pi$ ).

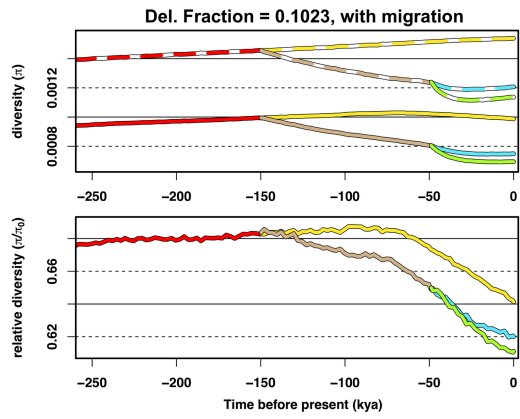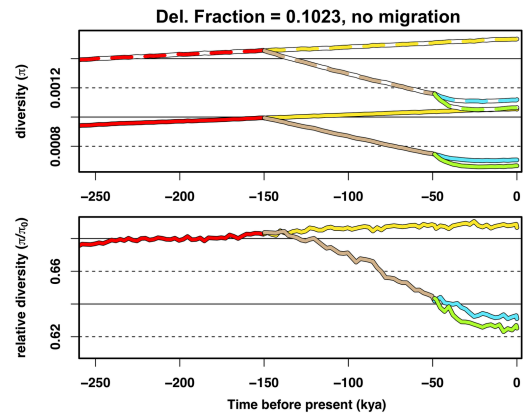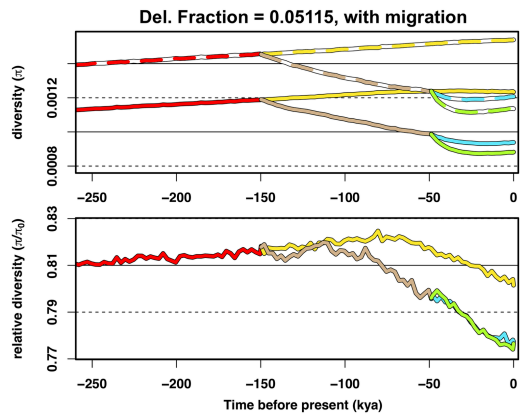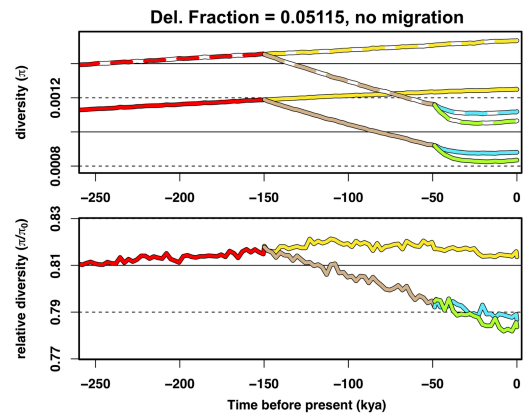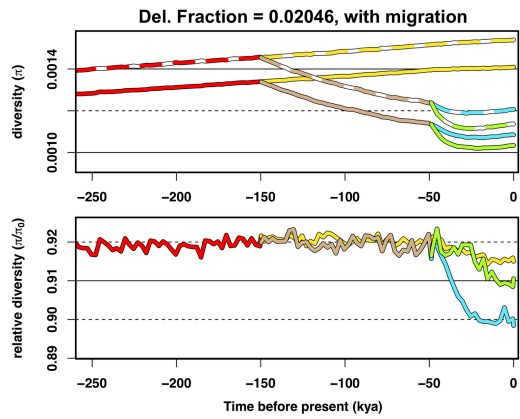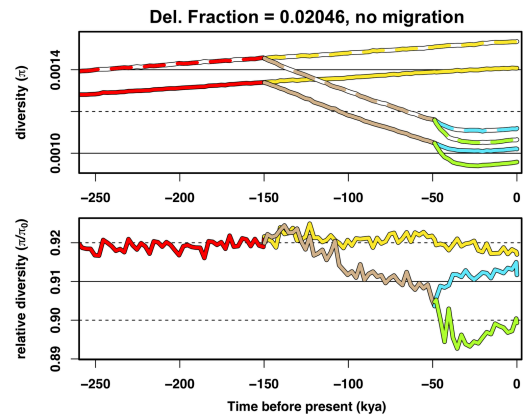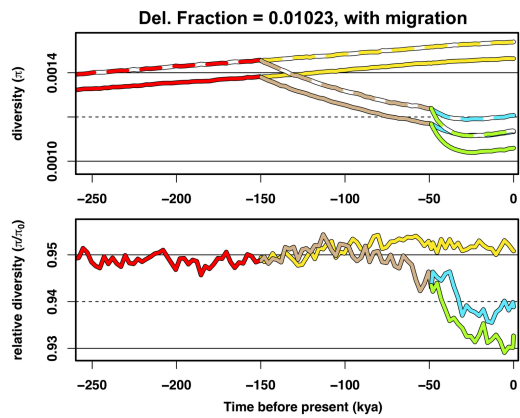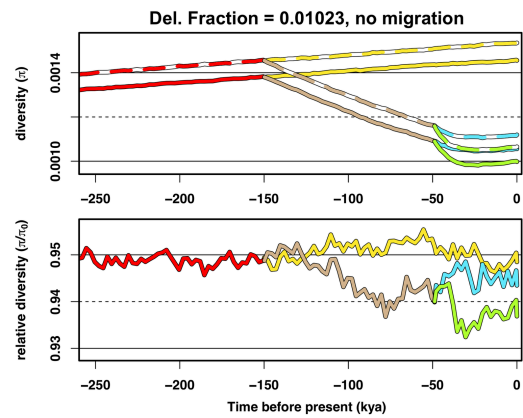

**S8 Fig. Simulations of diversity and relative diversity under BGS using various fractions of sites experiencing deleterious mutation.**

Values for the deleterious site fraction are provided in the title for each set of plots. Left column plots show results of simulations under a demographic model with migration between all human populations. Right column plots show results of simulations under a demographic model with no migration. Colored lines represent different populations through time and are identical to those in Fig 5 and S7 Fig. The demographic model used is also identical to that in Fig 5 (for simulations with migration) and S7 Fig (for simulations without migration). Simulation data was sampled every 100 generations (see S5 Table for exact values of mean  $\pi$ ).



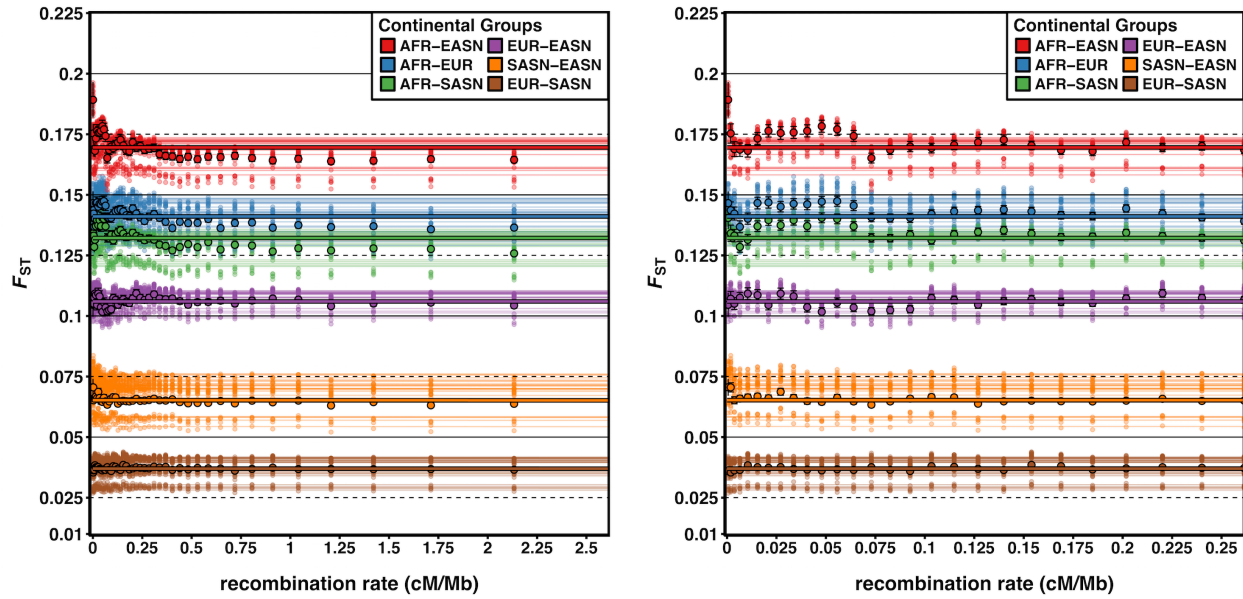

**S9 Fig.  $F_{ST}$  is not correlated with recombination rate.**

$F_{ST}$  between TGP populations measured across 2% recombination rate quantile bins. The right panel of S9 Fig displays a narrower range of recombination rates to show detail. Smaller transparent points and lines show the estimates and corresponding lines of best fit (using linear regression) for  $F_{ST}$  between every pairwise population comparison within a particular pair of continental groups (25 pairwise comparisons each). Larger opaque points and lines are mean  $F_{ST}$  estimates and lines of best fit across all population comparisons within a particular pair of continental groups. Error bars represent  $\pm 1$  SEM calculated from 1,000 bootstrapped datasets.

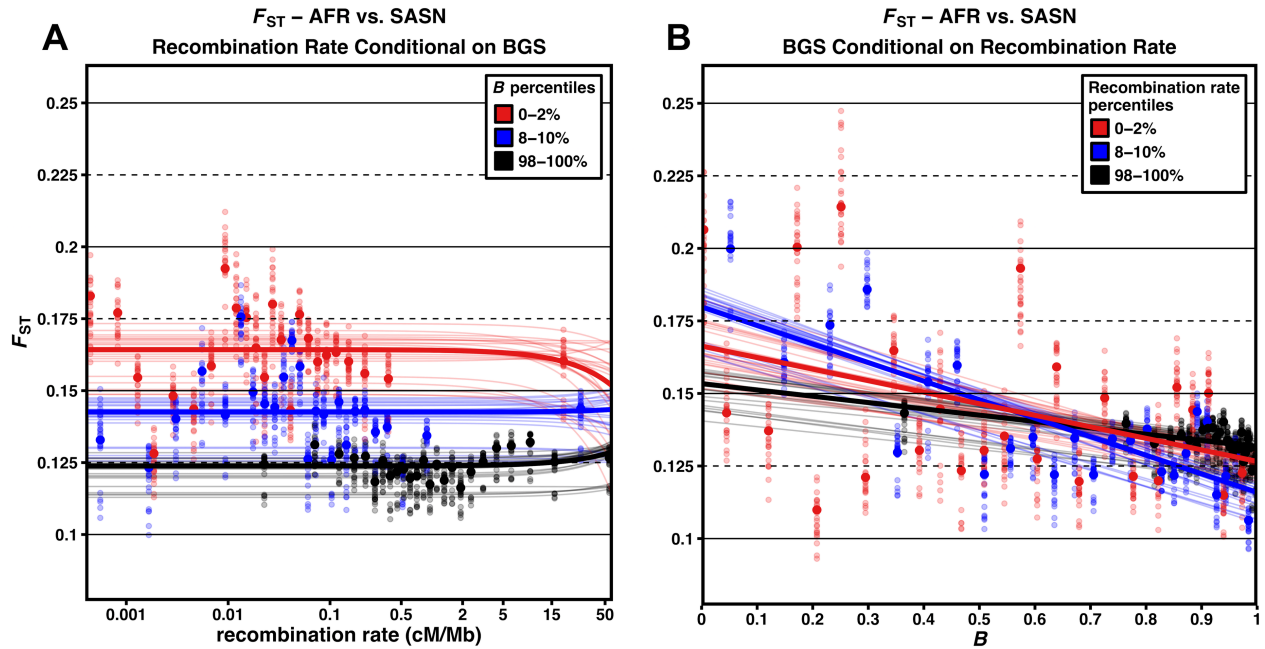

**S10 Fig.  $F_{ST}$  between African (AFR) and South Asian (SASN) populations jointly across  $B$  and recombination rate.**

(A)  $F_{ST}$  as a function of 25 recombination rate bins (4% quantile bins) conditional on three different 2%  $B$  quantile bins (note log scale of x-axis for recombination rate). (B)  $F_{ST}$  as a function of 25  $B$  bins (4% quantile bins) conditional on three different 2% recombination rate quantile bins. Smaller transparent points and lines show the  $F_{ST}$  estimates and corresponding lines of best fit (using linear regression) for each of the pairwise comparisons of AFR vs. SASN Thousand Genomes Project (TGP) populations (25 comparisons total). Larger opaque points are mean  $F_{ST}$  estimates across all pairwise comparisons of AFR vs. SASN TGP populations (with bold lines showing their corresponding lines of best fit).

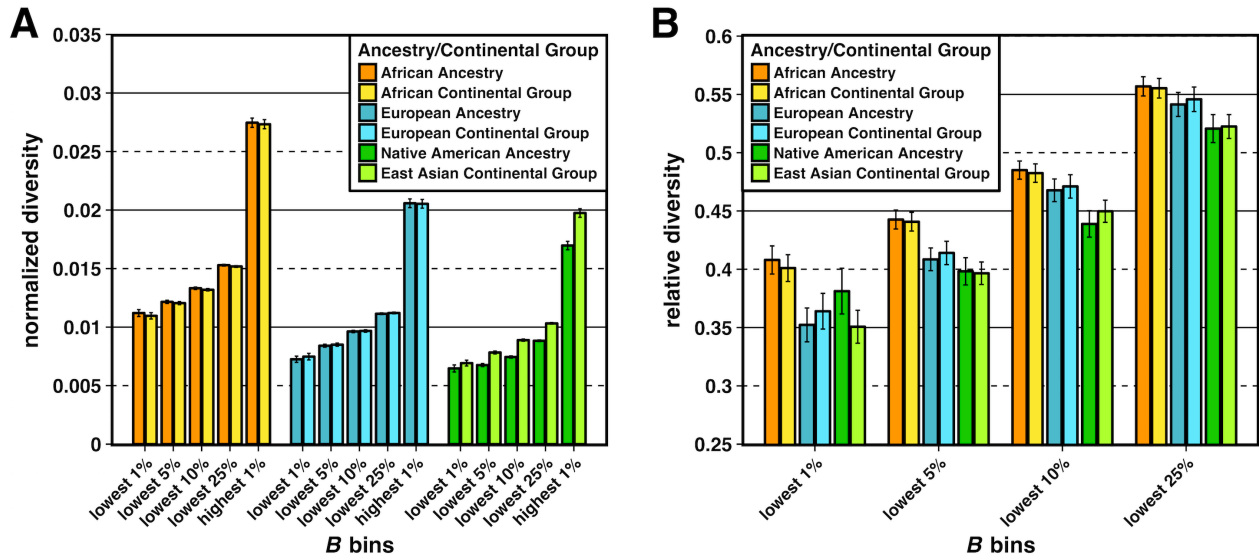

**S11 Fig. Comparing patterns of diversity between local ancestry segments of admixed samples and continental groups.**

(A) Normalized diversity (heterozygosity/divergence) and (B) Relative diversity: the ratio of normalized diversity in the lowest  $B$  quantile bins (strong BGS) in (A) to normalized diversity in the highest 1%  $B$  quantile bin (weak BGS) in (A). Local ancestry segments include African, European, and Native American ancestries. Continental groups include African, European, and East Asian. Error bars represent  $\pm 1$  SEM calculated from 1,000 bootstrapped datasets. See S4 Table for underlying data.

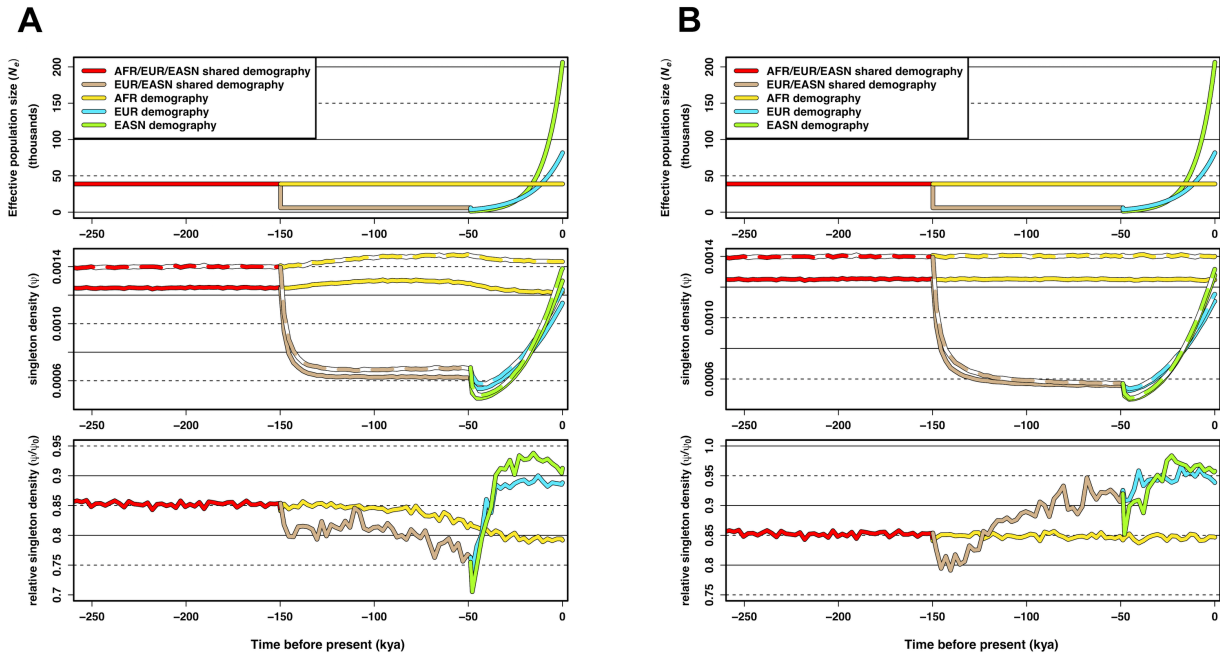

**S12 Fig. Simulations of singleton density and relative singleton density.**

(A) Results of simulations under a demographic model with migration between all human populations. (B) Results of simulations under a demographic model with no migration. The second row of (A) and (B) shows measurements of singleton density (i.e., number of singletons observed per site) from simulations without BGS ( $\psi_0$  - dashed colored lines) and with BGS ( $\psi$  - solid colored lines). The bottom row of (A) and (B) shows corresponding relative singleton density ( $\psi/\psi_0$ ) measured by taking the ratio of singleton density with BGS ( $\psi$ ) to singleton density without BGS ( $\psi_0$ ) at each sampled generation time point. The simulation data used for these measurements is identical to that of Fig 5 (for simulations with migration) and S7 Fig (for simulations without migration). See S6 Table for exact values of mean  $\psi$ .

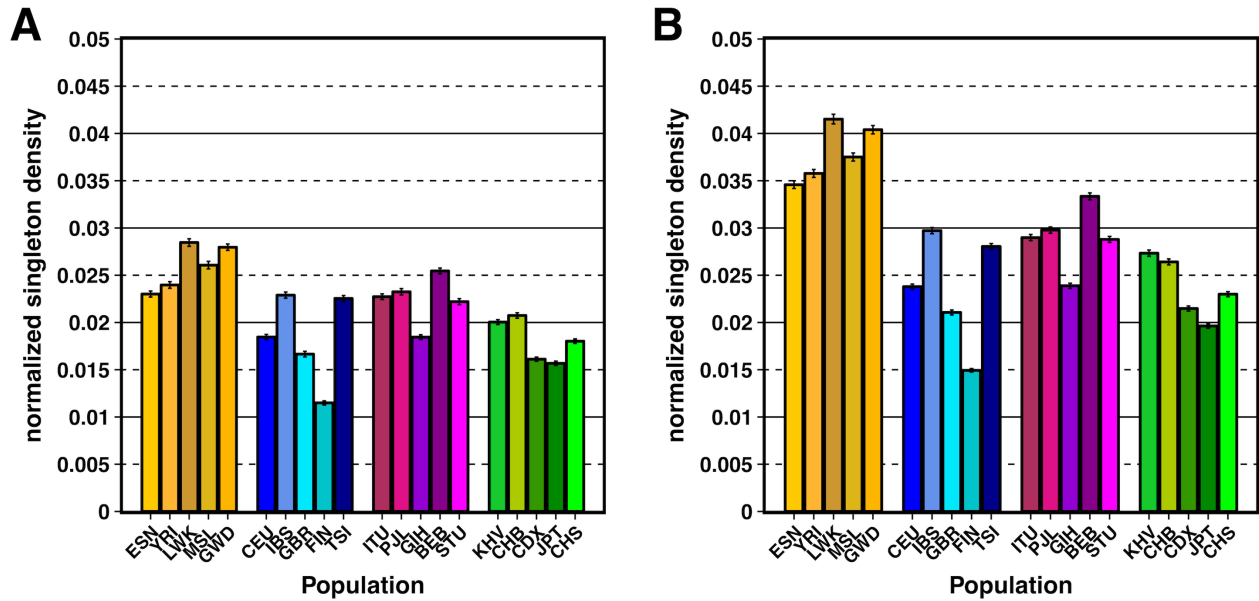

**S13 Fig. Singleton density for the lowest and highest 1% *B* quantile bins for non-admixed populations of the Thousand Genomes Project (TGP).**

(A) Normalized singleton density ( $\psi/\text{divergence}$ ) measured across the lowest 1% *B* quantile bin (strong BGS). (B) Normalized singleton density measured across the highest 1% *B* quantile bin (weak BGS). TGP population labels are indicated below each bar (see Table L in S1 Text for population label descriptions), with African populations colored by gold shades, European populations colored by blue shades, South Asian populations colored by violet shades, and East Asian populations colored by green shades. Error bars represent  $\pm 1$  SEM calculated from 1,000 bootstrapped datasets. See S3 Table for underlying data.
